# Supplementary material for: Bolometric IR photoresponse based on a 3D micro-nano integrated CNT architecture
Source: publisher site journal article supplement (doi:10.3762/bjnano.15.84), 2024-08-15
Supplement: Additional file 1 [file 2190-4286-15-84-S1.pdf]

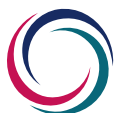

## Supporting Information

for

### **Bolometric IR photoresponse based on a 3D micro-nano integrated CNT architecture**

Yasameen Al-Mafrachi, Sandeep Yadav, Sascha Preu, Jörg J. Schneider  
and Oktay Yilmazoglu

*Beilstein J. Nanotechnol.* **2024**, *15*, 1030–1040. [doi:10.3762/bjnano.15.84](https://doi.org/10.3762/bjnano.15.84)

## Additional experimental data

SEM images of further devices

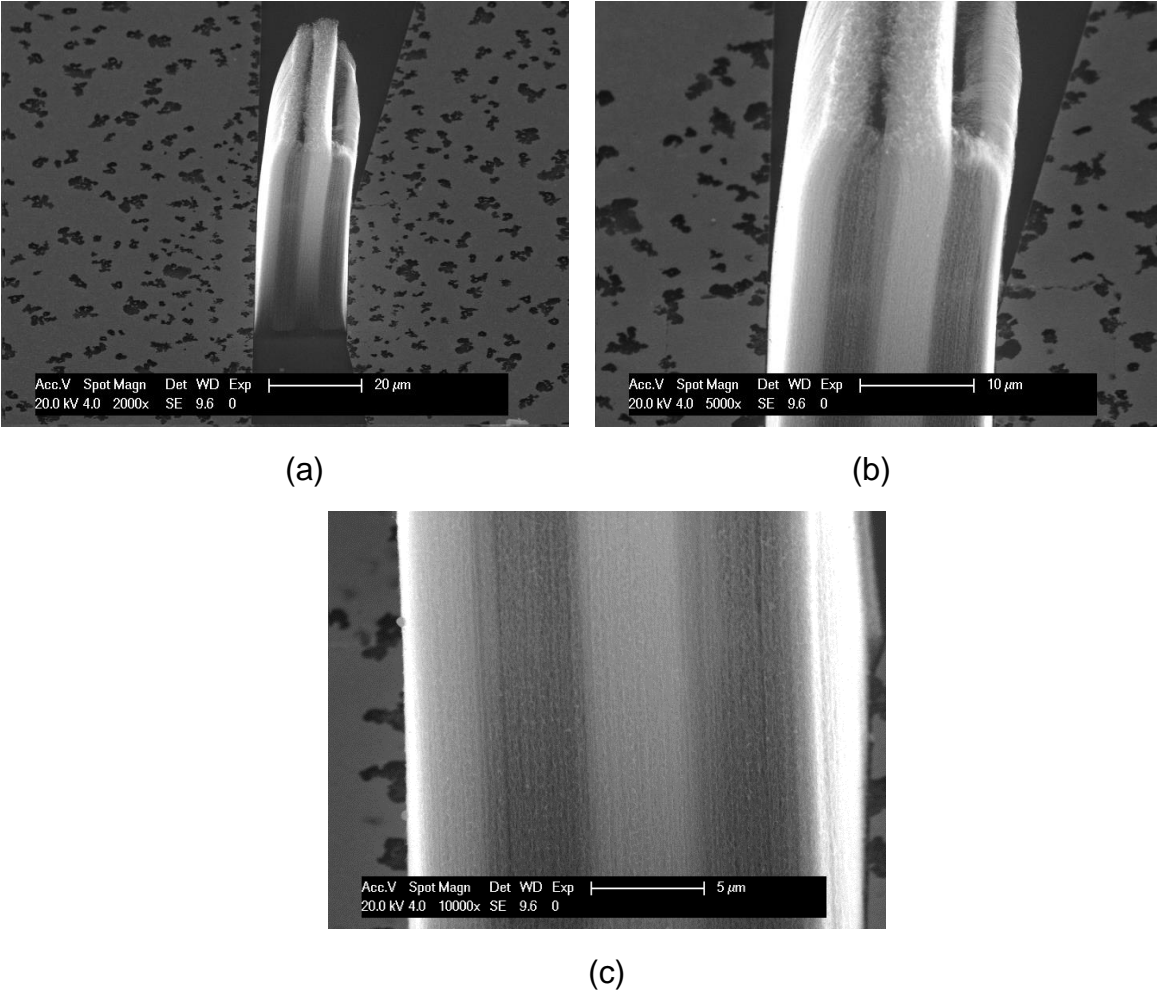

Figure S1: (a) SEM images of the additional device 3. (b,c) Device 3 with higher magnifications.

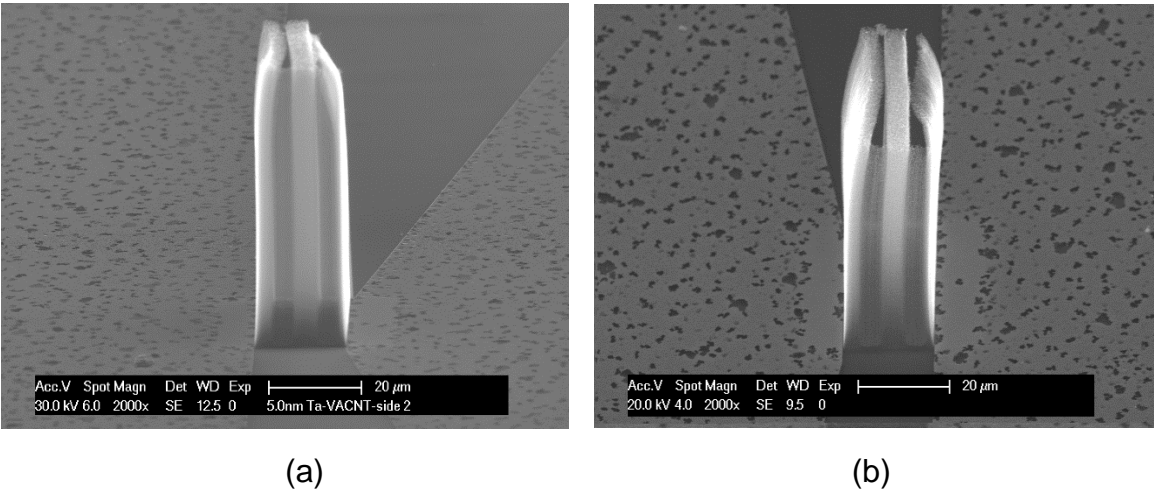

Figure S2: (a) SEM images of device 4 and (b) device 5.

Single oscilloscope measurements from device 3 using direct Au whisker contacts (configuration 2).

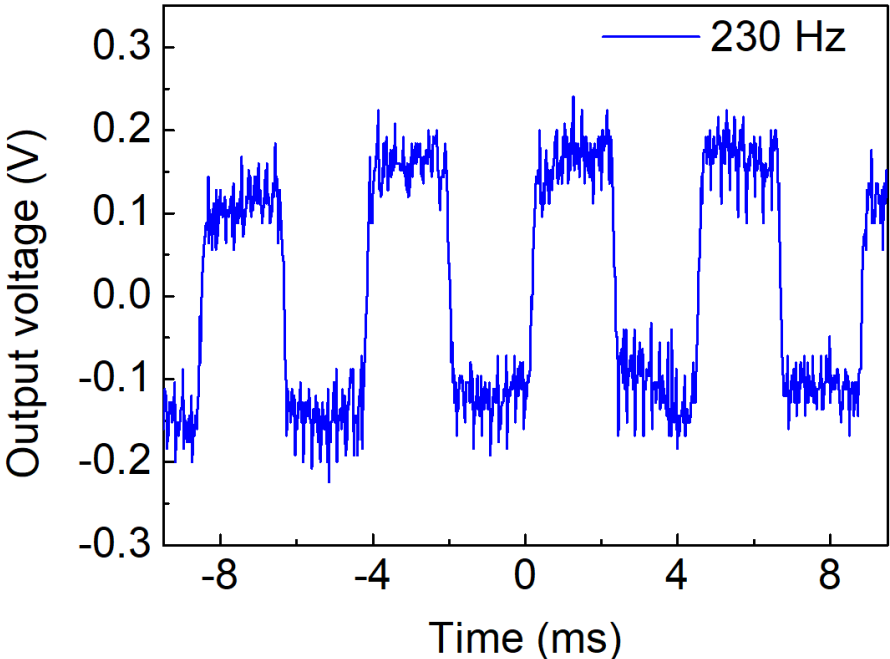

Figure S3 (a): Single response measurement of device 3 at 230 Hz chopping frequency.

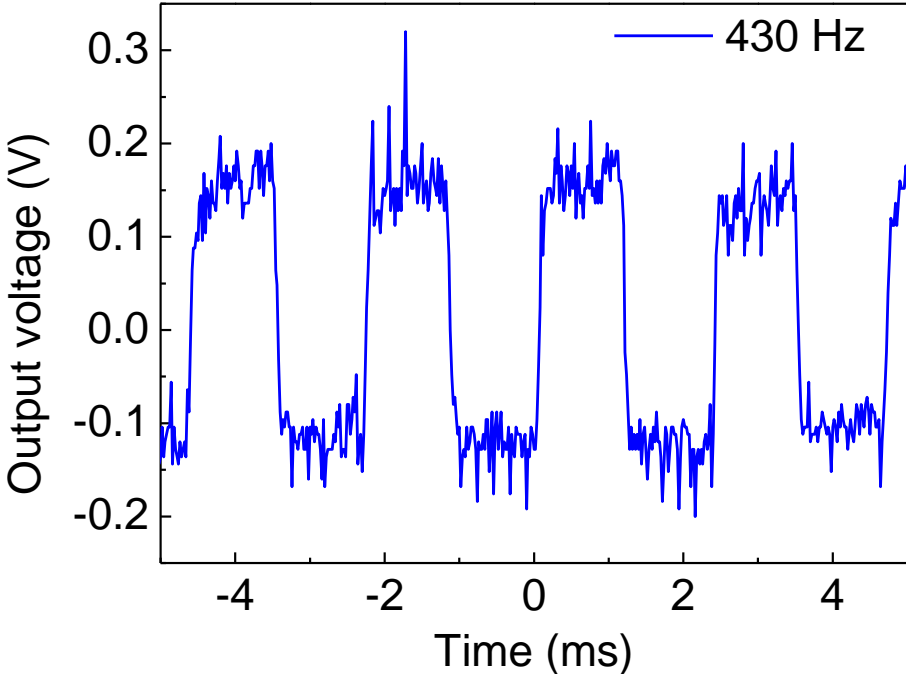

Figure S3 (b): Single response measurement of device 3 at 430 Hz chopping frequency.

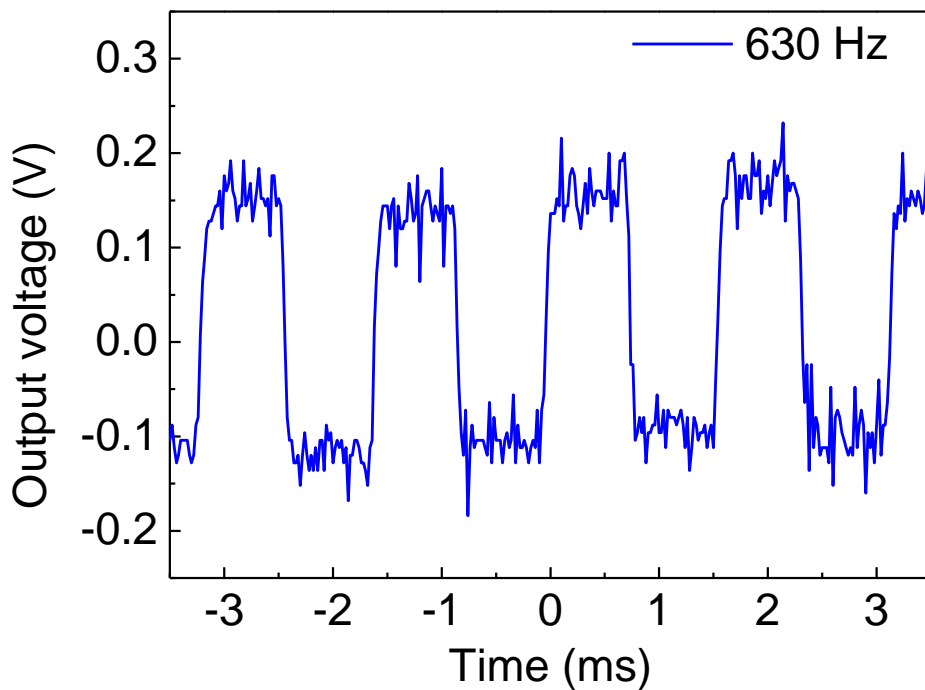

**Figure S3 (c):** Single response measurement of device 3 at 630 Hz chopping frequency.

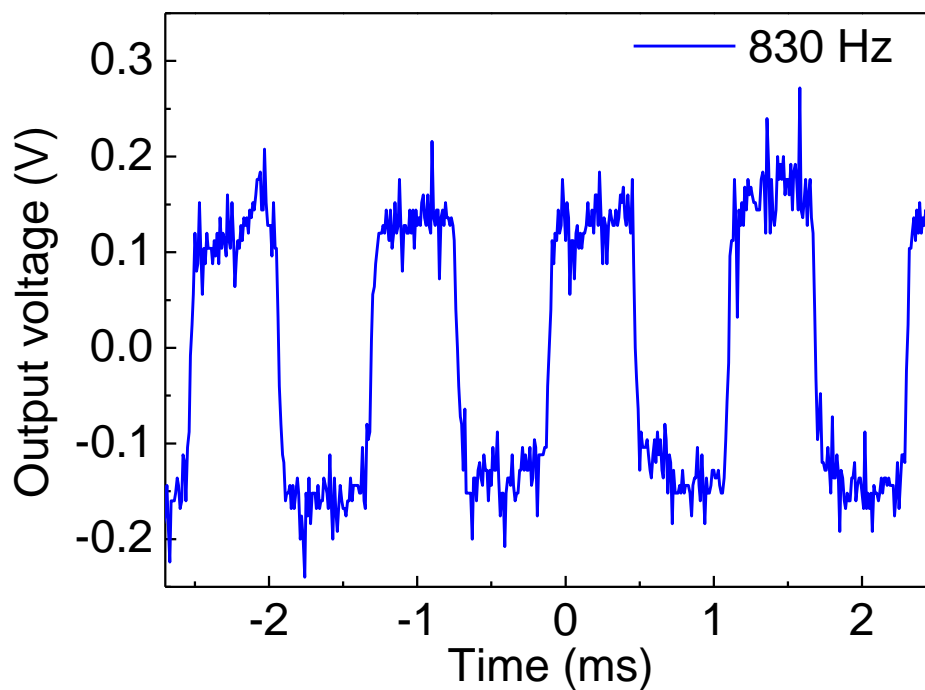

**Figure S3 (d):** Single response measurement of device 3 at 830 Hz chopping frequency.

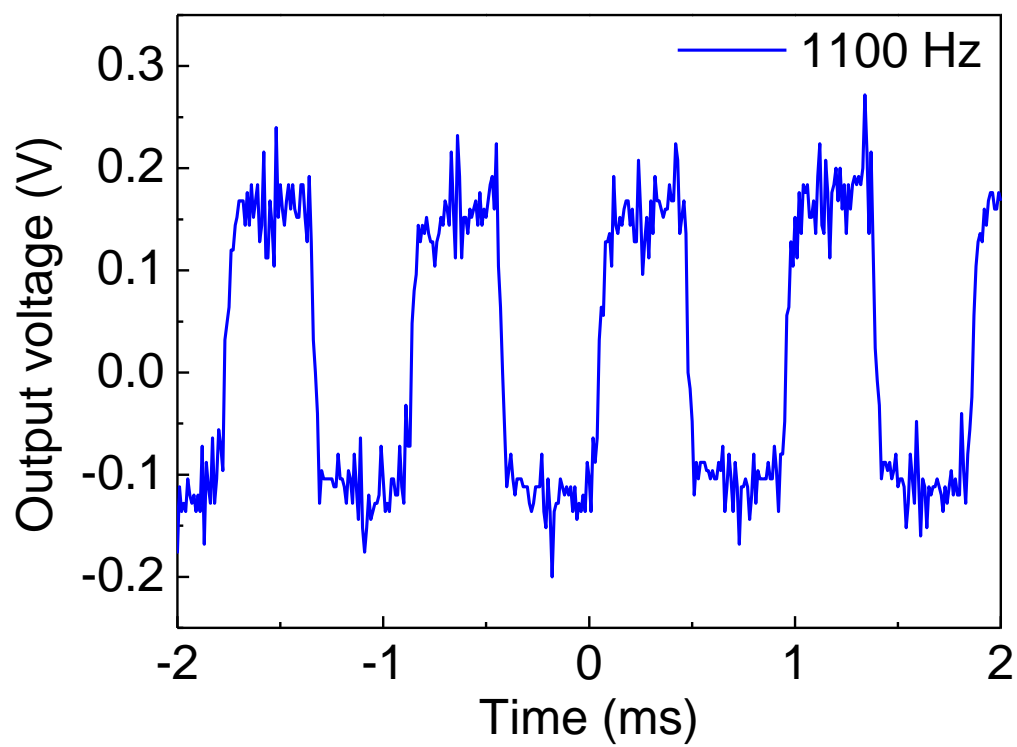

**Figure S3 (e):** Single response measurement of device 3 at 1100 Hz chopping frequency.

Single oscilloscope measurements from device 4 using direct Au whisker contacts (configuration 2).

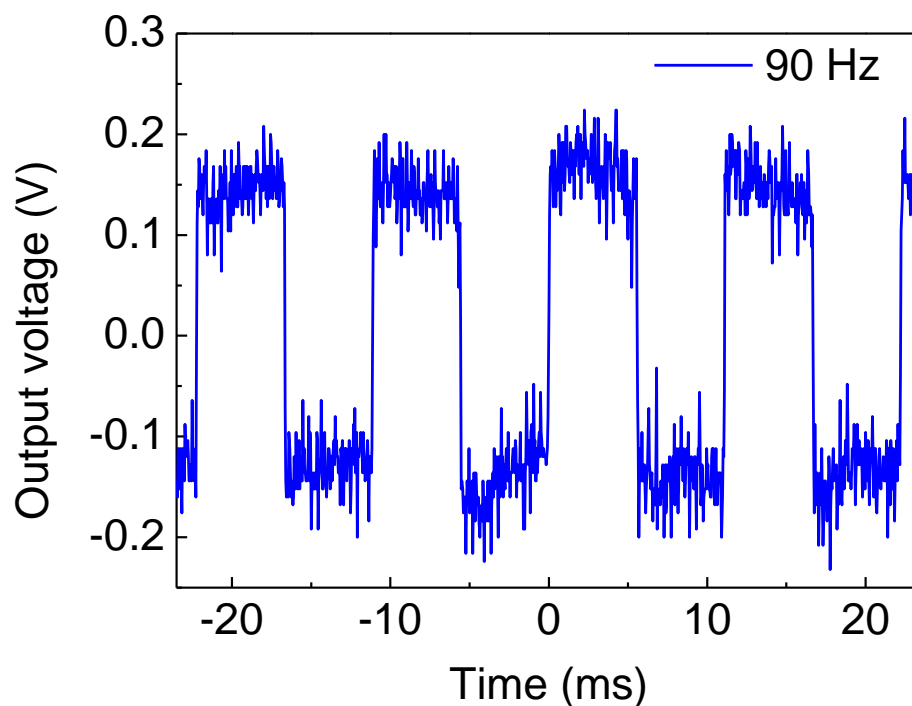

Figure S4 (a): Single response measurement of device 4 at 90 Hz chopping frequency.

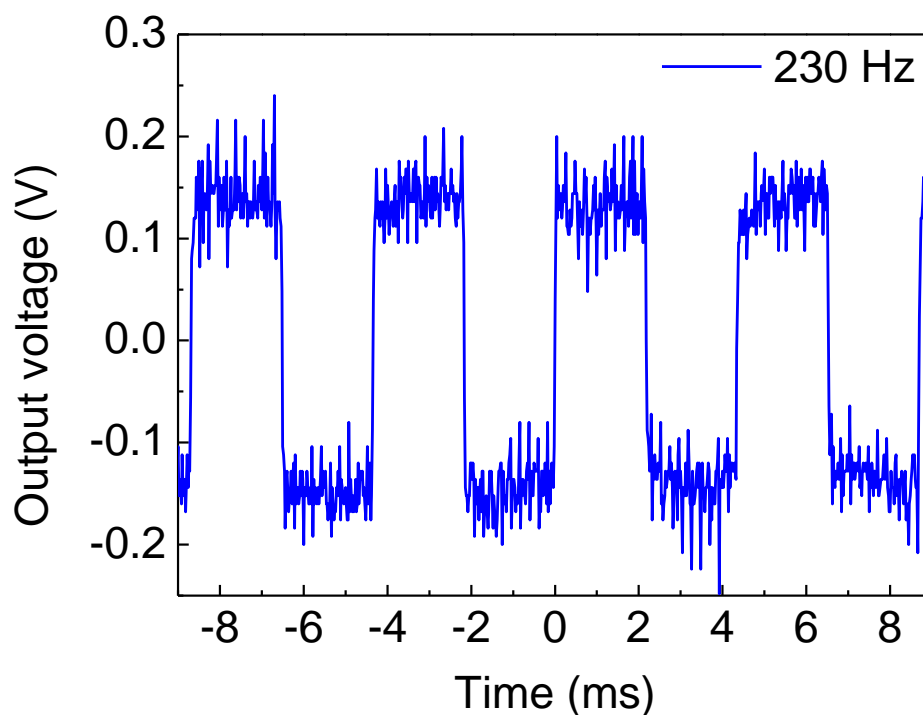

Figure S4 (b): Single response measurement of device 4 at 230 Hz chopping frequency.

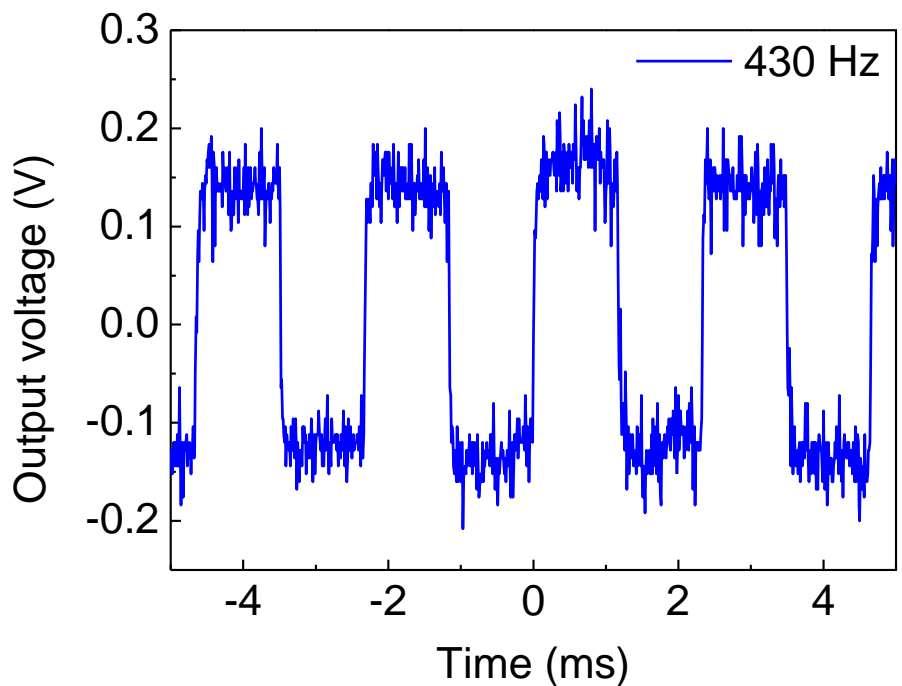

**Figure S4 (c):** Single response measurement of device 4 at 430 Hz chopping frequency.

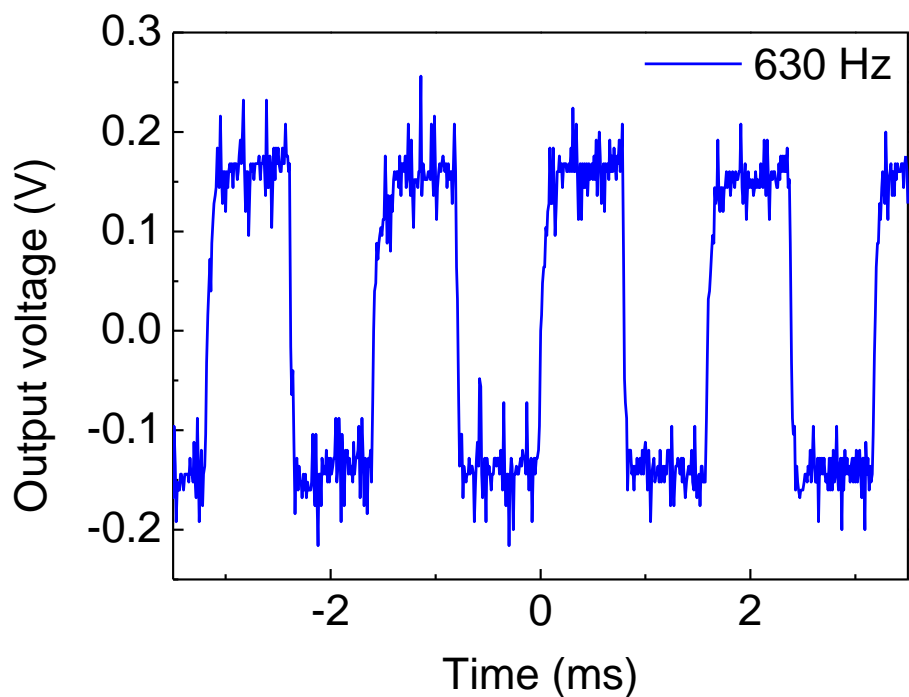

**Figure S4 (d):** Single response measurement of device 4 at 630 Hz chopping frequency.

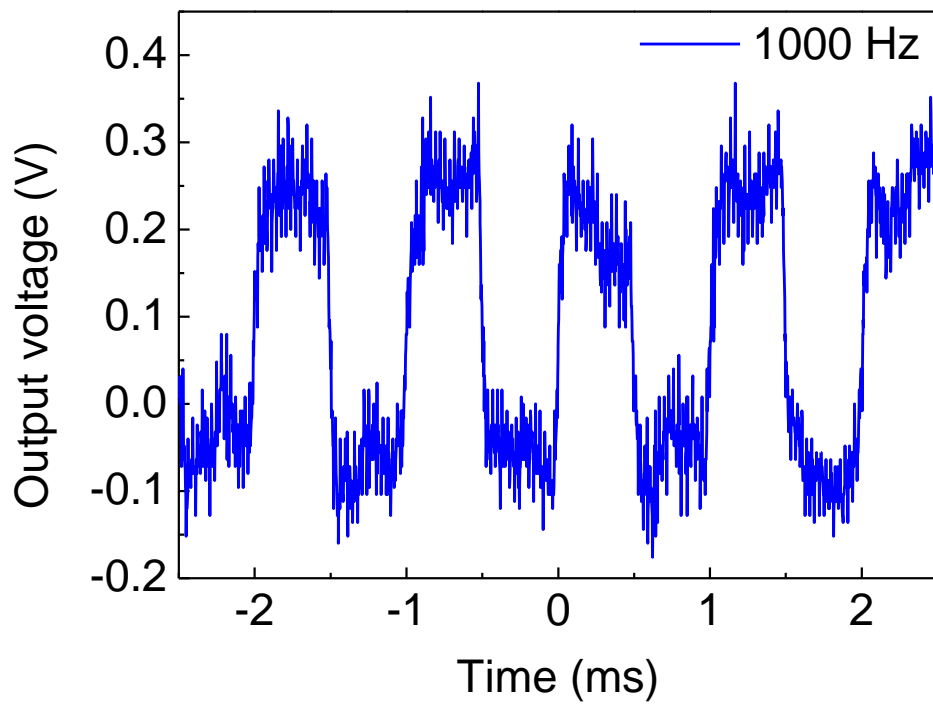

**Figure S4 (e):** Single response measurement of device 4 at 1000 Hz chopping frequency.



Single oscilloscope measurements from device 5 using direct Au whisker contacts (configuration 2).

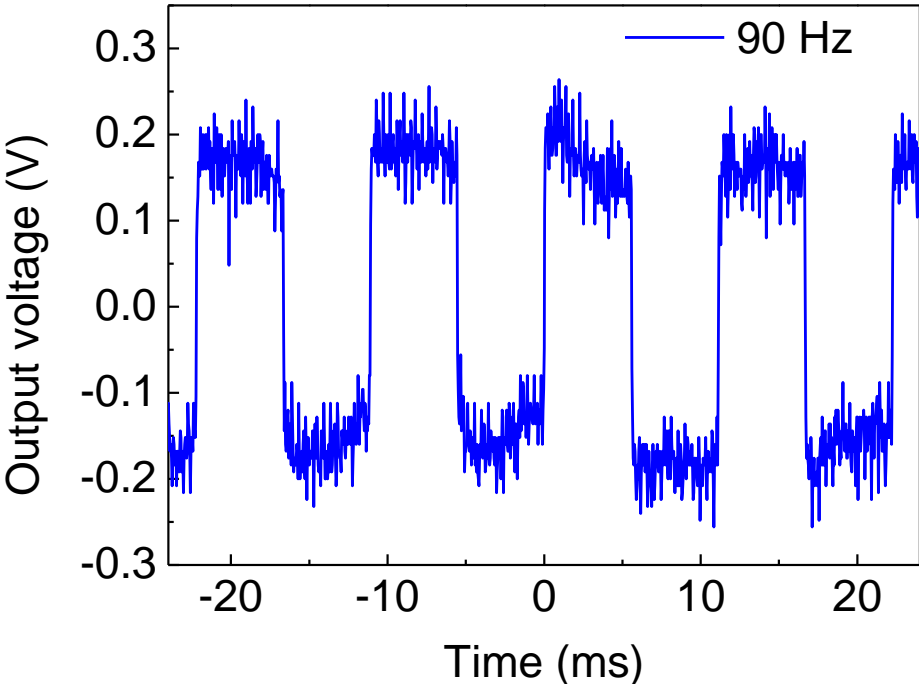

Figure S5 (a): Single response measurement of device 5 at 90 Hz chopping frequency.

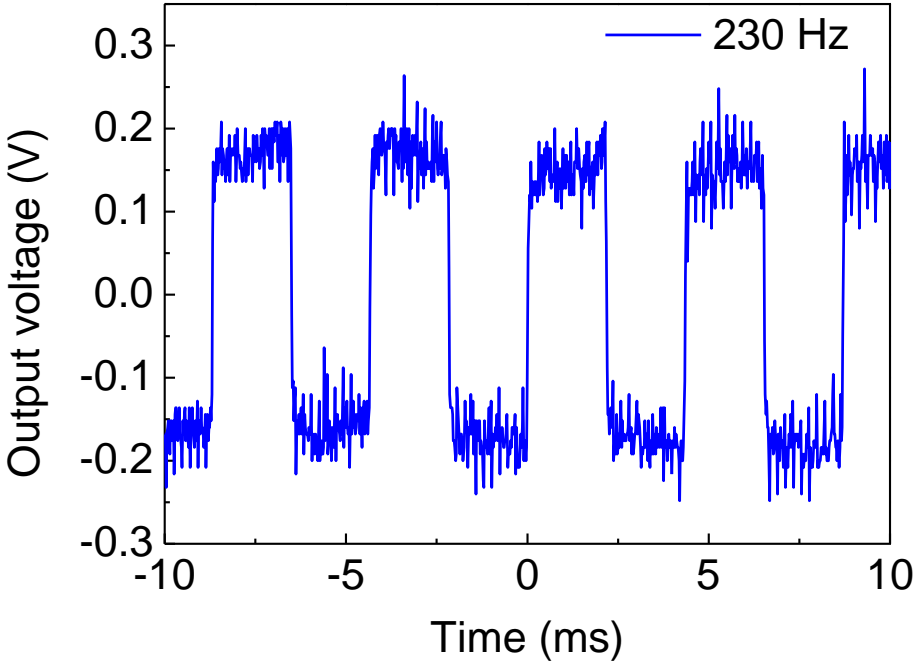

Figure S5 (b): Single response measurement of device 5 at 230 Hz chopping frequency.

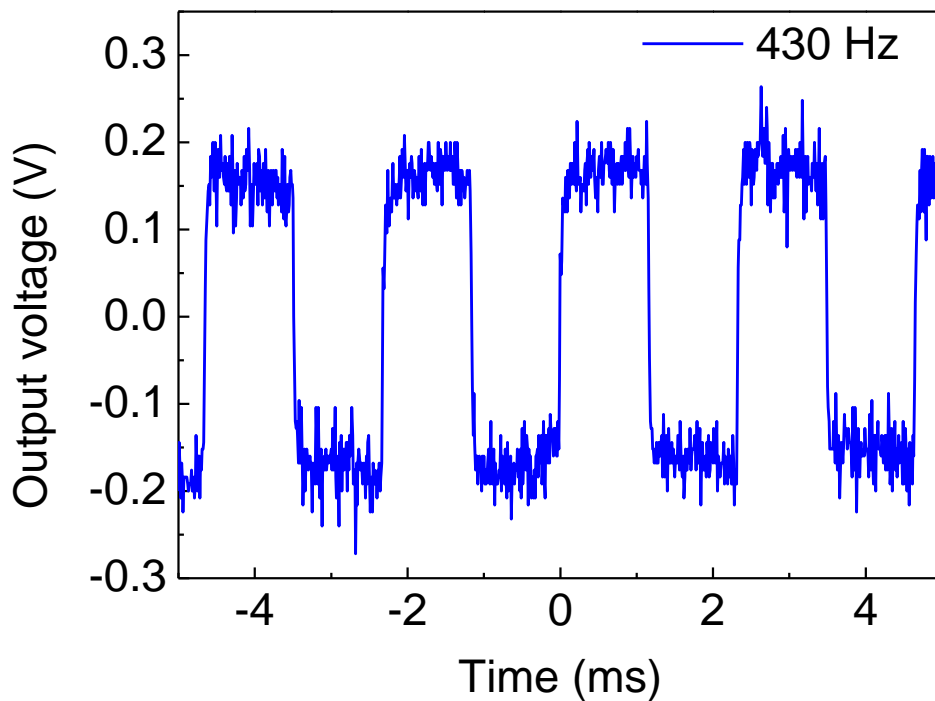

**Figure S5 (c):** Single response measurement of device 5 at 430 Hz chopping frequency.

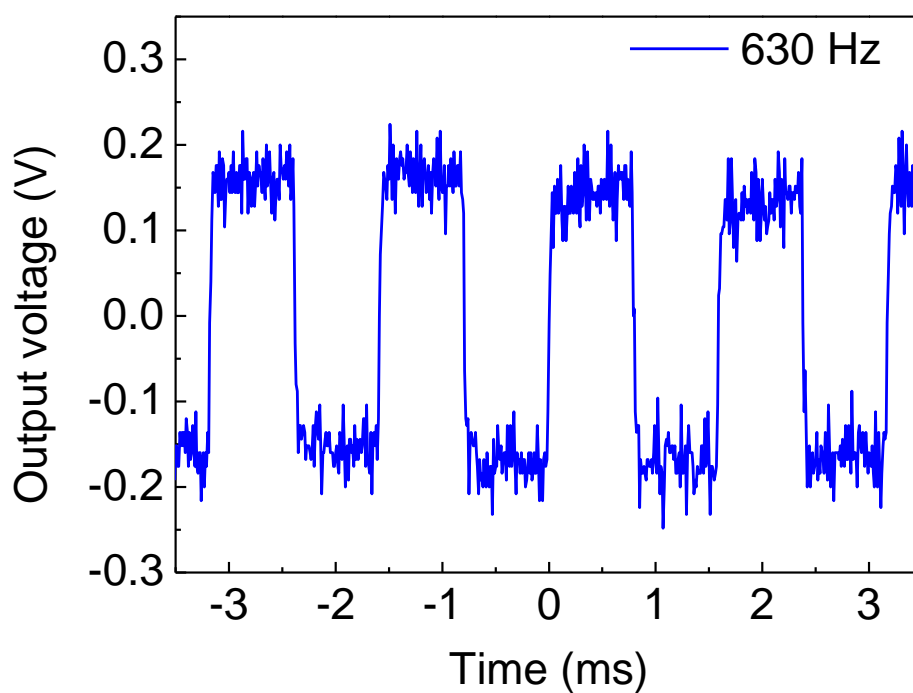

**Figure S5 (d):** Single response measurement of device 5 at 630 Hz chopping frequency.

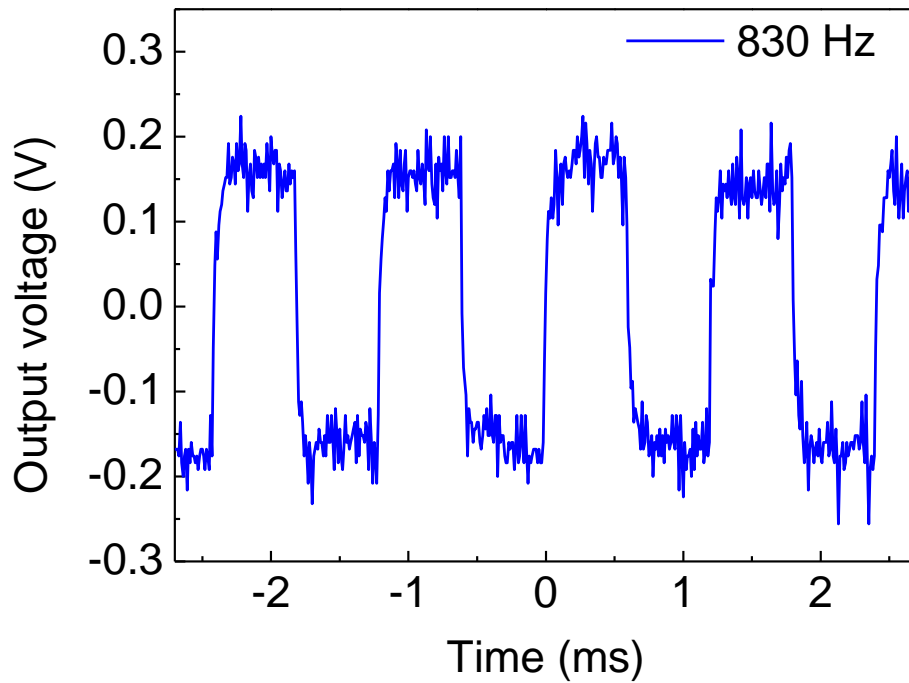

**Figure S5 (e):** Single response measurement of device 5 at 830 Hz chopping frequency.

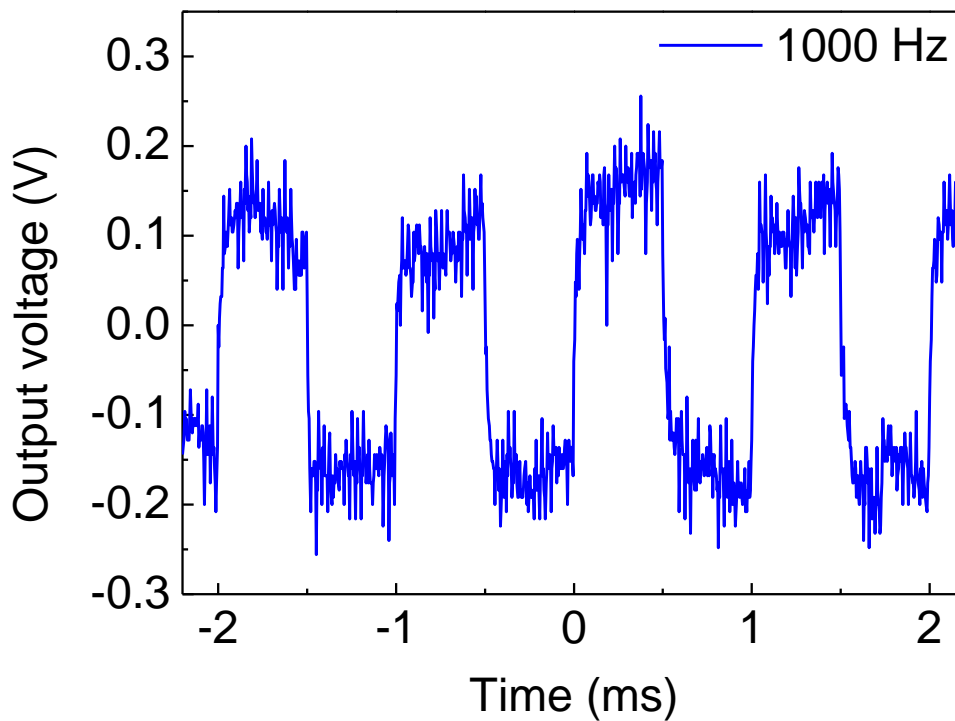

**Figure S5 (f):** Single response measurement of device 5 at 1000 Hz chopping frequency.
